# Supplementary material for: Laser Therapy for Onychomycosis: Fact or Fiction?
Source: PubMed Central journal article supplement (PMC5770012; doi:10.3390/jof1010044), 2015-04-03
Supplement: jof-01-00044-s001.pdf [file jof-01-00044-s001.pdf]

## Supplementary Information

**Table S1.** Laser Characteristics by Study.

| Laser Model        | Study        | Model                          | Wavelength (nm)       | Pulse Duration                                          | Number of Treatments | Treatment Interval       | Repetition Rate (Hz) | Fluence (J/cm <sup>2</sup> )     | Spot Size (mm) | Peer-Reviewed |
|--------------------|--------------|--------------------------------|-----------------------|---------------------------------------------------------|----------------------|--------------------------|----------------------|----------------------------------|----------------|---------------|
| Short Pulse Nd:YAG | Hochman (15) | Aerolase LightPod Neo          | 1064                  | 0.65 ms                                                 | 2–3                  | —                        | —                    | 223                              | 2              | Yes           |
|                    | Kimura (16)  | Not specified                  | 1064                  | 0.3 ms                                                  | 1–3                  | 4, 8 weeks               | 5                    | 14                               | 5              | Yes           |
|                    | Waibel (17)  | Sciton JOULE ClearSense *      | 1319, 1064, BroadBand | —                                                       | 4                    | 1 week                   | —                    | —                                | —              | Yes           |
|                    | Hollmig (18) | Sciton JOULE ClearSense *      | 1064                  | 0.3 ms                                                  | 2                    | 2 weeks                  | 6                    | 5                                | 6              | Yes           |
|                    | Choi (19)    | Lutronic AccuSculpt            | 1444                  | 0.1 ms                                                  | —                    | —                        | 20                   | Total energy 150 J, 300 J, 450 J | —              | Yes           |
|                    | Carney (20)  | Cutera Genesis Plus *          | 1064                  | <i>In vitro</i> , 0.1–0.3 ms<br><i>In vivo</i> , 0.3 ms | —<br>5               | —<br>Weeks 0, 1, 2, 3, 7 | 7–10<br>2            | 5–50<br>16                       | 3–5<br>5       | Yes           |
|                    | Zhang (22)   | Nuvolase PinPointe FootLaser * | 1064                  | 30 ms                                                   | 4, 8                 | 1 week                   | 1                    | 240–324                          | 3              | Yes           |
|                    | Moon (23)    | Sciton JOULE ClearSense *      | 1064                  | 0.3–200 ms                                              | 5                    | 4 weeks                  | —                    | 5                                | 6              | Yes           |
| Long Pulse Nd:YAG  | Noguchi (24) | Candela GentleYAG              | 1064                  | 0.5 ms                                                  | 3                    | —                        | 2                    | 10                               | 6              | Yes           |
|                    | Hees (25)    | Nuvolase PinPointe FootLaser * | 1064                  | 0.1 ms                                                  | —                    | —                        | —                    | 5–25                             | 1–5            | Yes           |
|                    |              | Cynosure Elite                 | 1064                  | 40 ms                                                   | —                    | —                        | —                    | 50                               | 3              |               |

**Table S1.** *Cont.*

| <b>Laser Model</b>               | <b>Study</b>      | <b>Model</b>                         | <b>Wavelength (nm)</b> | <b>Pulse Duration</b> | <b>Number of Treatments</b> | <b>Treatment Interval</b> | <b>Repetition Rate (Hz)</b> | <b>Fluence (J/cm<sup>2</sup>)</b>                      | <b>Spot Size (mm)</b> | <b>Peer-Reviewed</b> |
|----------------------------------|-------------------|--------------------------------------|------------------------|-----------------------|-----------------------------|---------------------------|-----------------------------|--------------------------------------------------------|-----------------------|----------------------|
| <b>Q-switched Nd:YAG</b>         | Hees (26)         | Cynosure Affinity QS, Cynosure Elite | 1064/532               | 6 ns, 40 ms           | —                           | —                         | —                           | 4–100                                                  | 2–10                  | Yes                  |
|                                  | Kalokasidis (5)   | Light Age Q-Clear *                  | 1064/532               | 9 ns                  | 2                           | —                         | 5                           | 14                                                     | 2.5                   | Yes                  |
| <b>Diode</b>                     | Landsman (30, 31) | Nomir Noveon *                       | 870/930                | —                     | 4                           | Days 1, 14, 42, 120       | —                           | 204–424                                                | 1.5 cm                | Yes                  |
| <b>Other Solid State Lasers</b>  | Manevitch (33)    | Coherent Mira 900 Ti:sapphire        | 800                    | 200 fs                | 1                           | 4 weeks                   | 76 MHz                      | 10(31)–10(32) photons m <sup>-2</sup> ·s <sup>-1</sup> | —                     | Yes                  |
|                                  | De Morais (34)    | Industra Etherea Er:YAG              | 2940                   | 2 ms                  | —                           | —                         | 1                           | —                                                      | —                     | No                   |
| <b>Fractional CO<sub>2</sub></b> | Lim (9)           | Lutronic Mosaic eCO <sub>2</sub>     | —                      | —                     | 3                           | 4 weeks                   | —                           | —                                                      | —                     | Yes                  |

\* Approved in USA.
